# Supplementary material for: Hydrogen Sulfide Improves the Cold Stress Resistance through the CsARF5-CsDREB3 Module in Cucumber
Source: MDPI journal article supplement (doi:10.3390/ijms222413229), 2021-12-08
Supplement: s1 [file s1]

## Supplemental Tables

**Scheme 1. Primers used for gene expression analysis and vector construction.**

| Primer name      | sequence (5' to 3')       |
|------------------|---------------------------|
| CsARF5-F         | ATGGGCTCTGTGGAAGAGAAG     |
| CsARF5-R         | GTATACTCAGGCTGAGGCATG     |
| CsDREB3-F        | ATGAGAAATTGGGGGAAATGG     |
| CsDREB3-R        | TTTCAACAGTAACACACA        |
| CsCBF1(qRT)-F    | TACAGAGGAGTCAGGAGGA       |
| CsCBF1(qRT)-R    | AGAATCGGCGAAATTGA         |
| CsCOR(qRT)-F     | ACTTTGAGAGGACATTTGATG     |
| CsCOR(qRT)-R     | GAAGCTCCAATTTTGACTTG      |
| CsARF5(qRT)-F    | GGTGGAAGTACTTTGGTTGATCATG |
| CsARF5(qRT)-R    | AGCAGAGCACAGTTCGTCATAGTTC |
| CsDREB3(qRT)-F   | TGCGCCTCGTGATGTTCAAG      |
| CsDREB3(qRT)-R   | ATCCTCCTCTAAGCTCTGCA      |
| $\beta$ -actin-F | AGAAGATCTGGCATCACA        |
| $\beta$ -actin-R | TCCAATCCAGACACTGTACT      |

**Supplemental Table 2. The promoter sequence of *CsDREB3***

TAATCTCAATTGAATACAATTATAGGAATTGACATTATATTGTATTTTGTAAAATGAA  
AACATGATACTGTAAGAAAGTGAATTAACCTATTCAATAGTGATAGAAACAAACAAAT  
TTCTATATTTGTCTCTCTATACACAATTCATAAAAAGACAAATAAAAAGAGATAGAT  
AAAGATATACATCTAAAGTTATATTTCTTTCTATCTCTGTCTATCTTTATCCATAATTC  
ATTATAAAAAGACGAATAACAAGGGATAGATAGAGATAATTAACATCTGCAGATAGAC  
AGAGATATATGCTTATTTTGTCTATCTCTATCCACGTTTCTTTATAAAAATAATAAAAA  
ATAGATGATGATCCTAATCACAATGCAATGGTACAATTAGAATGTTTTATCTGACATA  
GATAGATGAAAAGAGATACTTATCTCTACCTATATATGTCCATTATTCATAATGGTA  
AATAATATAACTTTCTGTTAAGATAGGTAAGAGAAAAGTAATAAGTATAAATAAATA  
TAATGGTAGTTTAATATAAATGCTATATTTACTATCATGAATGCAAAATTGTATGGTT  
TTATTTGATTTAGAGAAAAACATGGTTACGGGACAAATTATTAGTTTTATAAATTGTT  
ATAAAATTAATTCTTTGAAATCGTGAACCAATAATAAAGTGTTGCACCTTAAACATAGA  
ATCTTATGATAGTTATTAGTTTTTAAATATTTAAATTAATAGATCTAAGATCACATT  
AGTTCTAATTAGATTAGAATTAAGTCTTATTTTAGTTTTAATAACTAAAGATGACA  
AATAGGGTGTTCAATCGTAAGGAACTTTACTAGTAACATTCTGTCTAAGGTTGGGAG  
TCCTTAAGTTGAAGATTTACGAAACACCTCCCTACTTAGGAATAAACTGAAGTCGGA  
GTTGAATTGATCTAAGTATTACTCGCATGCAATGTCACTAGGTTTAGTTAAATGGTTT  
AATTCACCTAGAAACATTAGTATAGAAACCTTATTACAATAGTTGATAGACATAGACT  
TAGATAGATTTATTAGTTGGAATTTAGCCAAGTACACCAAAAACCAAAAATAAG  
GTAACCTTTAGTGGAAGATAAAGGTATATGATAAATCAATTAGCTCTCCCGTCCCT  
ATGAGTCCATACTGTCAAATCCATGCTCAACTTCGTGTTGTCTTAGACATGACCTCCC  
TTTGAAAAATGTTTGCATGGGTCAATAATAGGGTGAATAGGGGAAGTCGTTCTTAGTA  
AGTGAAAGAAGGATGTGTATCAATGTATCCTACGGTCTCCTTCATTCAATCCAAGTGT  
GAGATTTCTATGGTCCACCTACATGTCATCCTGGAGTGATCATCCCTTCGAGGGTTTG  
ACCATATAAATTAGAACACCACAACTTCAATAACGGAGAGAGTTTCTAGGTTAATA  
TTCAACAATTTGCTTTTCTTACGGAAGTCTGTTGAAGCGTACCTTTGGAATCTGAAAA  
TGGTAGGGTTAGACTAACGAGATTATTTTAGTTAACGAATCCTTAACCAACAACAGT  
AGCTAAGAACTATAAGAATAAAAGTTATTCTAGTATTAATAATTAGATTACTACAAG  
AAAATAGGGTTCTTCCAACGCACAAAATTTTATCGGGGTAAAGAGCAATTAAGAAACA  
GGCCTTTGCGCGTTGCCGTAAGTCGTGCATCGAGAATATGAATCTATTCGGATGTATT  
GCTTCTGACATCAGACAAAGCTAGACCATCCTTGATGTTGCACACATAAACATCAAA  
AAAGGTGAAACAATAAATTATAATTTCTTTCTCGACATTGTGCAGACAAACGTT  
ATGAATGACTTCCATATTTTGGACGTGGACCTTTAAGGAGTTGAGGGAAATGAAATTC  
TTATTTAATTGTTTACCTTTTCTGATGCCATGTGTGAGAACGTCTAGACTATTATGGA  
TATCTTGATGTGTCCACTCACAACGTTAAAGG

Note: Shaded nucleotides indicate the CsARF5 binding site

## Supplemental Figures

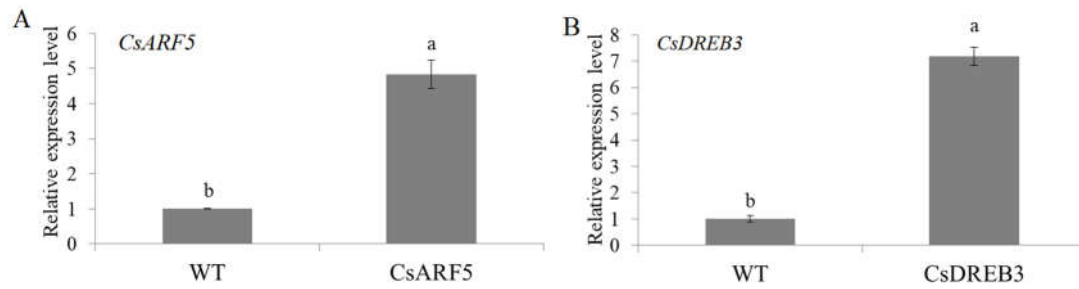

### Supplemental Figure 1. Identification of the transient transgenic cucumber leaves.

(A) qRT-PCR analysis the expression of *CsARF5* in transient transgenic cucumber leaves. WT, empty vector control; *CsARF5*, *CsARF5*-overexpressing cucumber leaves. qRT-PCR was performed in three biological replicates and three technical replicates. The value of WT was used as the reference and was set to 1. Error bars denote standard deviations. Different letters above the bars indicate significant differences ( $P < 0.05$ ) based on Duncan's multiple range tests.

(B) qRT-PCR analysis the expression of *CsDREB3* in transient transgenic cucumber leaves. WT, empty vector control; *CsDREB3*, *CsDREB3*-overexpressing cucumber leaves. qRT-PCR was performed in three biological replicates and three technical replicates. The value of WT was used as the reference and was set to 1. Error bars denote standard deviations. Different letters above the bars indicate significant differences ( $P < 0.05$ ) based on Duncan's multiple range tests.
